1 **Chemotherapy induced immunogenic cell death alters response to exogenous activation of**  
2 **STING pathway and PD-L1 immune checkpoint blockade in a syngeneic murine model**  
3 **of ovarian cancer**

4  
5 Sarah Nersesian<sup>1,2</sup>, Noor Shakfa<sup>1,3</sup>, Nichole Peterson<sup>4</sup>, Thiago  
6 Vidotto<sup>1,5</sup>, Afrakoma AfriyieAsante<sup>1,3</sup>, Elizabeth Lightbody<sup>1,6</sup>, and Madhuri Koti\*<sup>1,3,4</sup>

7  
8 **Affiliations**

9 <sup>1</sup>Department of Biomedical and Molecular Sciences, Queen's University, Kingston, Canada

10 <sup>2</sup>School of Medicine, Dalhousie University, Halifax, Canada

11 <sup>3</sup>Cancer Biology and Genetics, Queen's Cancer Research Institute, Queen's University,  
12 Kingston, Canada

13 <sup>4</sup>Department of Obstetrics and Gynecology, Kingston Health Sciences Center, Queen's  
14 University, Kingston, Canada

15

16 Short title: Adding a little STING to chemotherapies in high grade serous ovarian carcinoma:

17 doxorubicin vs carboplatin

18 Keywords: Ovarian cancer, Immunogenic cell death, STING agonist, PD-L1, Immune checkpoint

19 blockade, ID8 syngeneic murine ovarian cancer cells

20

21 **\*Corresponding author**

22 Madhuri Koti, DVM, MVSc, PhD

23 Department of Biomedical and Molecular Sciences and Obstetrics and Gynecology

24 Queen's University, Kingston, Ontario K7L3N6, Canada

25 e-mail: [kotim@queensu.ca](mailto:kotim@queensu.ca)

26 **Abstract (currently 349 words)**

27 Poor response to platinum/taxane-based chemotherapy has remained a major hurdle in the  
28 management of high grade serous carcinoma of the ovary (HGSC). Recurrent HGSC is often  
29 treated with liposomal doxorubicin as a second line chemotherapy. Unfortunately, HGSC patients  
30 have not benefited from immunotherapies targeting the PD-1/PD-L1 immune checkpoint axis. In  
31 a pre-clinical study evaluating the efficacy of a “Stimulator of Interferon Genes” (STING)  
32 agonist, we demonstrated the synergistic potential of STING pathway activation in enhancing  
33 response to carboplatin chemotherapy and sensitization to PD-1 immune checkpoint blockade  
34 (ICB). Since carboplatin and doxorubicin exhibit distinct immunogenic cell death (ICD)  
35 inducing potential, we investigated the chemotherapy specific effect in the magnitude of  
36 response to exogenous STING pathway activation. Immunocompetent C57/BL6 mice were  
37 implanted with ID8-*Trp53*<sup>-/-</sup> cells followed by treatment with carboplatin or doxorubicin. Towards  
38 rationalized addition of STING agonist with or without PD-L1 blockade, we first determined the  
39 expression of 60 known ICD associated genes at an early time point following the initial treatment  
40 with carboplatin or doxorubicin with or without STING agonist. Doxorubicin treated tumours  
41 showed significantly higher expression of ICD genes, *Cxcl10*, *Cd274*, *Isg15*,  
42 *Psmb9* and *Calr*. Expression changes were further amplified following the addition of STING  
43 agonist. Significantly higher expression of *Cxcl10* and *Isg15* were observed in the doxorubicin +  
44 STING agonist treated mice compared to carboplatin + STING agonist combination.  
45 Interestingly, *Ccl5* gene expression was higher in the tumours from carboplatin or carboplatin and  
46 STING agonist combination treated mice compared to those treated with doxorubicin. Plasma  
47 cytokine analysis showed distinct profiles of CXCL10, CCL5, MCP-1 and IL6 post treatment with  
48 each chemotherapy type. Doxorubicin monotherapy treated mice showed significantly longer

49 overall survival compared to their carboplatin counterparts with further increases following  
50 addition of either STING agonist or PD-L1 ICB. However, despite the stronger ICD inducing  
51 ability of doxorubicin, overall survival of mice treated with carboplatin + STING agonist + PD-  
52 L1 ICB was the longest. Findings from our pre-clinical study provide novel insights for  
53 rationalized combinations of immune sensitizing agents such as STING pathway activators to  
54 improve response of HGSC patients to chemotherapy and ICB in the primary and recurrent  
55 settings.

56

57

## 58 INTRODUCTION

59 High grade serous carcinoma of the ovary (HGSC) is a deadly disease with a five-year survival  
60 rate of just 45.6% that has seen little improvement over the past few decades<sup>1,2</sup>. The poor survival  
61 rate of HGSC patients can be attributed to a variety of factors including diagnosis at later  
62 stages and high rates of resistance and recurrence<sup>3</sup>. Indeed, the majority of women diagnosed with  
63 HGSC present with advanced disease. At an advanced stage there are limited treatment options  
64 such as cytoreductive surgery followed by platinum and taxane-based combination  
65 chemotherapies. These treatments are largely ineffective as 70% of patients will  
66 relapse progressing to platinum-resistant HSGC. While other “hard-to-treat” tumor types have  
67 seen vast improvements with the integration of cancer immunotherapies, such as immune  
68 checkpoint blockade (ICB), HGSC has not seen the similar success<sup>4</sup>. Most ICB therapies have  
69 been shown to enhance the pre-existing immune landscape, specifically the presence  
70 of lymphocytes that express the target immune checkpoint for blocking and subsequent activation  
71 is required for effective treatment<sup>5,6</sup>. For example, a pre-treatment tumour immune landscape with  
72 a high number of tumour infiltrating lymphocytes (TILs) is broadly defined as “hot/T-cell  
73 inflamed” and in most cases predictive of better prognosis and response to ICB when compared to  
74 their low TIL “cold/T cell non-inflamed” counterparts<sup>7,8</sup>.

75 In our previous reports, we showed the pre-treatment immune transcriptome of tumours  
76 from platinum-resistant HGSC patients are intrinsically immunologically cold<sup>9,10</sup>. We  
77 demonstrated that a non-inflamed pre-existing T helper type I tumor immune microenvironment  
78 (TIME), decreased expressions of type I interferon (IFN1) genes and STAT1 protein, low density  
79 of TILs associated with poor response to chemotherapy<sup>10</sup>. Strategies attempting to

80 transform these immunologically cold tumors to hot, thus improving therapeutic response through  
81 IFN1 activation, have recently garnered tremendous interest across solid tumours<sup>8,11</sup>.

82 One such example is using immune activating agents, including those that  
83 activate (cGAS)-Stimulator of Interferon Genes (STING) pathway (Figure 1A). Activation  
84 of STING pathway primarily occurs via cytosolic nucleic acid sensing that leads to increased  
85 production of IFN induced genes, specifically the TIL recruiting CXCR3  
86 binding chemokines, CXCL9/10/11 and CCL5<sup>11-13</sup>. Supporting this hypothesis,  
87 we previously reported that response to platinum chemotherapy can be improved via incorporating  
88 STING agonist post carboplatin chemotherapy. In this pre-clinical study using the ID8-*Trp53*<sup>-/-</sup>  
89 syngeneic murine model of HGSC, we also showed the immune sensitizing potential of STING  
90 agonist to programmed cell death protein-1 (PD-1) ICB<sup>12</sup>. Addition of STING agonist to the  
91 treatment regimen significantly improved survival both when administered as a monotherapy  
92 and in combination with carboplatin and PD-1 ICB. Potentially attributed to  
93 the angiostatic function of CXCL10 chemokine, treatment with STING agonist also reduced  
94 ascites formation and overall tumor burden. Additionally, an enrichment of genes associated with  
95 antigen presentation, MHCII, IFN response, and increased expression of *Stat1* and *Cxcl10* leading  
96 to overall enhancement of IFN1 immune responses in the TIME, were observed in the tumours  
97 from mice treated with STING agonist<sup>12</sup>.

98 While these results provide a strong rationale for testing these combination treatment  
99 approaches for patients with platinum-sensitive tumors, as previously mentioned, many patients  
100 progress to develop platinum-resistant HGSC<sup>1,14</sup>. Patients with recurrent HGSC are administered  
101 second line chemotherapies including doxorubicin, an anthracycline known to be  
102 a bonafide inducer of immunogenic cell death (ICD). ICD is an immune priming form of cell death

103 which occurs following exposure to a subset of cytotoxic chemotherapies or radiotherapy<sup>15-</sup>  
104 <sup>17</sup>. Chemotherapy induced ICD can increase tumour antigen recognition and cross presentation by  
105 dendritic cells or macrophages to cytotoxic TILs in the sterile TIME. Following this logic, ICD  
106 inducing chemotherapies have been combined with ICB to further augment anti-tumor  
107 immunity<sup>18</sup>. In addition to their ICD inducing effects, anthracyclines, including doxorubicin, have  
108 also been reported to increase PD-L1 expression on tumor cells predicting a stronger rationale  
109 for combination with ICB anti-PD-L1 treatment<sup>19,20,21</sup>.

110 Based on these compelling findings, we sought to compare the efficacy of immune  
111 activating STING agonist when combined with a stronger ICD inducer – doxorubicin in the ID8-  
112 *Trp53*<sup>-/-</sup> model of HGSC. We hypothesized that the effects we previously reported with a  
113 combination of carboplatin and STING agonist, could be further potentiated with a stronger ICD  
114 inducer such as doxorubicin. Based on our previous finding that STING agonist treatment led to  
115 increased tumour and splenic myeloid derived suppressor cell specific PD-L1 expression, we  
116 further evaluated the impact of combination with PD-L1 ICB on overall survival. Findings from  
117 our study provide novel directions for the precise use of therapies activating STING pathway in  
118 combination with ICD inducing chemotherapy.

119

## 120 **METHODS**

### 121 **Cell lines**

122 The ID8- *Trp53*<sup>-/-</sup> mouse ovarian surface epithelial cells were kindly provided by Dr.  
123 Ian McNeish (Imperial College, London, UK)<sup>21</sup>. Mutations in *TP53* gene are present in >95%  
124 HGSC tumours<sup>2</sup> and thus the recently modified ID8 cell line more closely recapitulates the human  
125 HGSC tumour progression. ID8-*Trp53*<sup>-/-</sup> cells were maintained in Dulbecco's Modified Eagle's

126 Medium (Sigma Aldrich, Canada) supplemented with 4% fetal bovine serum, 100 µg/mL of  
127 penicillin/streptomycin and a solution containing 5 µg/mL of insulin, 2.5 µg/mL of transferrin and  
128 2.5 ng/mL of sodium selenite.

129

### 130 ***In vivo studies***

131 All animal protocols were approved by the Queen's University Animal Care Committee. 5-6 x  
132 10<sup>6</sup> ID8-*Trp53*<sup>-/-</sup> cells in 200 µl of PBS were transplanted via intra-peritoneal (IP) injections in  
133 eight to ten-week old female C57BL/6 mice (Charles River Laboratories International Inc).  
134 Approximately 4 weeks post tumour cell implantation, mice were randomized and treated  
135 with 1) Carboplatin, 2) Doxorubicin, 3) Carboplatin + STING agonist, 4) Doxorubicin + STING  
136 agonist 5) Carboplatin + STING agonist + anti-PD-L1 or 6) Doxorubicin + STING agonist + anti-  
137 PD-L1 via IP administration, at the indicated doses and time points (Figure 1B). The anti-mouse  
138 PD-L1 antibody (clone RMP1-14; BioXcell) was administered two weeks following the last  
139 STING agonist injection at a dose of 200 µg per animal at two-day intervals for a total of four  
140 injections via IP route.

141

### 142 **Plasma cytokine profiling**

143 To determine the effect of chemotherapy type and combination with STING agonist, on the  
144 systemic cytokine profiles, plasma samples collected at 24 h time point following first STING  
145 agonist treatment post either carboplatin or doxorubicin treatment, were subjected to multiplexed  
146 cytokine profiling using the MD31, 31-plex cytokine/chemokine array (Eotaxin, G-CSF, GM-  
147 CSF, IFN gamma, IL-1alpha, IL-1beta, IL-2, IL-3, IL-4, IL-5, IL-6, IL-7, IL-9, IL-10, IL-12 (p40),  
148 IL-12 (p70), IL-13, IL-15, IL-17A, IP-10, CXCL1, LIF, LIX, MCP-1, M-CSF, MIG, MIP-1alpha,

149 MIP-1beta, MIP-2, RANTES, TNF alpha, VEGF) at Eve Technologies Corporation (Calgary,  
150 AB, Canada). All samples were analysed in biological triplicates. The standard curve regression  
151 was used to calculate the concentration of each target cytokine. Differences between levels of  
152 cytokines were analysed using GraphPad Prism (7.02).

153

#### 154 **Tumour ICD gene expression profiling using a custom NanoString panel**

155 To determine the ICD effect induced by carboplatin and doxorubicin chemotherapy and  
156 subsequent effects post addition of STING agonist, total RNA from tumours collected 24 h post  
157 first STING agonist treatment and the chemotherapy only controls, were subjected  
158 to NanoString based gene expression profiling using a custom ICD gene panel (Table 1).  
159 Briefly, total RNA from fresh frozen tumour tissues was isolated using the total RNA Purification  
160 Kit (Norgen Biotek Corporation) as per the manufacturer's instructions. RNA concentration and  
161 purity were estimated on a NanoDrop ND-100 spectrophotometer (NanoDrop Technologies,  
162 Wilmington, DE, USA). 150 ng of total RNA from each tumour sample was subjected to digital  
163 multiplexed profiling, using a custom ICD gene panel (60 ICD related genes with 5 housekeeping  
164 controls, NanoString Technologies Inc.) as per our previously established  
165 protocols. Normalization of raw data was performed using the nSolver software 3.0  
166 (NanoString Technologies, Seattle, WA). The raw NanoString counts were initially subjected to  
167 normalization for all target RNAs in all samples based on built-in positive controls. This step  
168 accounts for inter-sample and experimental variation such as hybridization efficiency and post-  
169 hybridization processing. The geometric mean of each control was then calculated to indicate the  
170 overall assay efficiency. The housekeeping genes were used for mRNA content normalization.



171 Differentially expressed genes between the tumours from different treatment groups were derived  
172 using GraphPad Prism software. A p-value <0.05 was considered statistically significant.

173

## 174 **RESULTS**

### 175 **Doxorubicin induces a higher and distinct expression of ICD genes compared to** 176 **carboplatin in ID8-*Trp53*<sup>-/-</sup> tumours**

177 The expression of 60 ICD associated genes was measured in RNA isolated from tumours of mice  
178 treated with carboplatin or doxorubicin monotherapy (Figure 2A and 2B). Genes specifically  
179 associated with IFN1 pathways, including, *Ifna1*, *Ifnb1*, *Psmb9* and *Cxcl10*, showed  
180 significantly (p<0.05) higher expression in doxorubicin treated mice compared to those treated  
181 with carboplatin (Figure 2B). Interestingly, *Ccl5* expression was higher in carboplatin treated  
182 tumours compared to those treated with doxorubicin.

183

### 184 **STING activation alters expression of tumour ICD associated genes in a chemotherapy** 185 **specific manner**

186 Addition of STING agonist post chemotherapy showed significant differences in the magnitude of  
187 ICD gene expression in tumours (Figure 3A). In general, doxorubicin + STING  
188 agonist combination showed significantly (p<0.05) higher expression of *Stat3*, *Casp8*, *Ifna1*,  
189 *Ido1*, *Prfl*, *CD274*, *Ifnb1*, *Casp1*, *Isg15*, *Stat1*, *Cxcl10*, *Psmb9*, *H2k1* and *H2d1*, compared to  
190 carboplatin chemotherapy (Figure 3B). Interestingly, however, the  
191 expression of *Cxcl9*, *Calr* and *Ccl5* was significantly higher in carboplatin + STING agonist  
192 treated tumours compared to those treated with doxorubicin (Figure 3B) indicative of their possible  
193 differential expression in cancer cells compared to immune cells.

194

### 195 **STING agonist amplifies doxorubicin mediated cytokine production**

196 To determine the chemotherapy associated differences in plasma cytokine levels, we conducted  
197 multiplex cytokine analysis of plasma collected at 24 h post first treatment with carboplatin,  
198 doxorubicin or untreated controls. Doxorubicin only treated mice showed elevated plasma levels  
199 if CXCL10, MCP-1, MIP-1B compared to those treated with carboplatin, however this difference  
200 was not statistically significant (Figure 4). Notably, the levels of CCL5 and IL-6 were significantly  
201 higher in doxorubicin treated mice compared to those treated with carboplatin (Figure 4).

202 The addition of STING agonist further elevated CXCL10 levels in the plasma  
203 of carboplatin and doxorubicin treated mice, however the difference between the two  
204 chemotherapy types was not significant (Figure 4). Interestingly, addition of STING agonist led to  
205 significantly increased levels of CXCL9 in carboplatin treated mice only (Figure 4). STING  
206 agonist treatment also further amplified CCL5 levels ( $p < 0.0001$ ) in doxorubicin treated mice  
207 compared to both carboplatin + STING agonist and vehicle control groups (Figure 4). Similar  
208 response patterns were observed in levels of MCP-1, MIP-1B, MCP-5 and IL-6.

209

### 210 **Addition of STING agonist post doxorubicin chemotherapy does not add a** 211 **survival advantage compared to carboplatin**

212 To evaluate the differential impact on overall survival, doxorubicin and carboplatin were used as  
213 single agents or in combination with a) STING agonist, b) anti-PD-L1 ICB or c) STING agonist  
214 and anti-PD-L1, in the ID8-*Trp53*<sup>-/-</sup> syngeneic mouse model. The rationale for addition of PD-L1  
215 ICB was based on post treatment tumour gene expression profiling that showed increased levels  
216 of *Cd274* (gene encoding PD-L1) following addition of STING agonist.

217 Comparison of chemotherapy types as single agents revealed  
218 that doxorubicin treated mice had significantly longer overall survival (average of 96.5 days) than  
219 carboplatin treated mice (average of 77 days; Figure 5). In line with our previously reported  
220 findings, addition of STING agonist significantly increased the survival of carboplatin treated  
221 mice by an average of 13 days (Figure 5). Although, the addition of anti-PD-L1 to carboplatin did  
222 not show any significant increase in overall survival, treatment with anti-PD-L1 following  
223 treatment with STING agonist and carboplatin chemotherapy significantly extended the median  
224 overall survival to 101 days (Figure 5B).

225 Surprisingly, upon addition of STING agonist or anti-PD-L1, we did not  
226 observe significantly increased survival advantage in the doxorubicin treated mice, with a modest  
227 increase in survival of 4 and 3.5 days respectively. Overall survival of doxorubicin  
228 + STING + anti-PD-L1 combination was, however, significantly increased to an average of 103  
229 days (Figures 5A and B).

230

231

## 232 **DISCUSSION**

233 Activation of the cGAS-STING pathway, via direct (STING agonist, oncolytic virus) and  
234 indirect (radiation, PARP inhibitors) approaches, is an emerging immune adjuvant treatment  
235 approach<sup>8,11</sup>. With several promising pre-clinical findings across an array of cancer models, recent  
236 reports including ours have confirmed the immune sensitizing effect of STING pathway activation  
237 thus improving response to conventional chemotherapy and novel ICB<sup>12</sup>. Importantly, our previous  
238 report showed that direct activation of STING pathway can enhance response to carboplatin  
239 chemotherapy and sensitize tumours to PD-1 ICB.

240 Patients with HGSC have minimally benefited from the newer ICB therapies indicating the  
241 lack of understanding in how the effect of ICB is dependent on the pre-existing TIME<sup>22</sup>. It is well  
242 established that HGSC tumours exhibit high genomic instability and thus are thought to be  
243 immunogenic, contributing to immunologically variant states that can be identified at the time of  
244 diagnosis or primary debulking surgery<sup>23</sup>. In line with these characteristics, we and others have  
245 previously shown that pre-existing immunologically divergent states also associate with  
246 chemotherapy response and overall survival, indicating the significance of IFN induced  
247 chemokines and associated ICD in mediating treatment response<sup>10,24</sup>. It is important to note that a  
248 growing body of evidence suggests a co-existence of inflamed and non-inflamed states across  
249 multiple regions in one given tumour<sup>25</sup>. However, irrespective of their classification, the density,  
250 localization and activation state of immune cells in the TIME could greatly impact variability  
251 in therapeutic response to immune based therapies, in addition to the type of chemotherapy<sup>26,27</sup>.

252 The level of ICD response elicited by chemotherapies is one example of a mechanism  
253 dependent on the pre-existing TIME. Specifically, ICD events lead to a release in danger associated  
254 molecular pattern (DAMP) in a spatiotemporal manner that can have a profound impact on the  
255 consequent activation of both innate and adaptive immune response. Therefore, a comprehensive  
256 understanding of treatment induced ICD events is critical for the design of  
257 rationalistic ICB combinations<sup>28,29</sup>. While radiation is the most potent ICD inducing therapy,  
258 chemotherapeutic agents such as anthracyclines, platinum, taxanes and other agents promote  
259 variable degrees of ICD events that ultimately alter tumour immunogenicity<sup>30,31</sup>. Along this  
260 notion, it can be speculated that inflamed tumours with high pre-existing activated TILs and  
261 IFN gene expression will produce a higher magnitude of immune-mediated responses compared  
262 to non-inflamed tumours given the proximity of intra-tumourally located TILs. Indeed, ongoing

263 ICB combination trials are exploring radiation induced ICD led immune sensitization in solid  
264 tumours. In the context of HGSC, PARP inhibitor induced STING pathway activation and  
265 combination with ICB is under several clinical trials<sup>32</sup>.

266 In HGSC, platinum-taxane based chemotherapy is widely used in the frontline setting  
267 whereas liposomal doxorubicin is practiced in post recurrence treatment in the second line  
268 setting<sup>33</sup>. Carboplatin and doxorubicin, elicit their cancer cell killing effects via distinct modes of  
269 action. For example, carboplatin functions by eliciting DNA damage to block replicative  
270 machinery and ultimately causes the cell to undergo apoptosis while doxorubicin intercalates with  
271 DNA to inhibit topoisomerase II function and produces a high level of reactive oxygen species  
272 leading to membrane damage<sup>34,35</sup>. While both are known to induce ICD, they achieve cell death  
273 through differing molecular mechanisms resulting in varying levels of ICD. Several previous  
274 reports have exploited these distinct capacities of doxorubicin with regard to cellular IFN $\gamma$   
275 responses<sup>17</sup>. Most recently Wilkinson et al., show this effect as a result of differential activation of  
276 cGAS-STING pathway in a chemotherapy specific manner  
277 (<https://www.biorxiv.org/content/10.1101/764662v2>). This study demonstrates the significant  
278 increase in levels of CXCL10/CCL5 as result of release of micronuclei following treatment with  
279 doxorubicin.

280 Towards their rationalized clinical translation in HGSC and differences in chemotherapy  
281 specific ICD inducing ability, in the current study, we evaluated the effect of synergistic STING  
282 pathway activation in the context of carboplatin and doxorubicin chemotherapy in the ID8-*Trp53*<sup>-/-</sup>  
283 syngeneic murine model of ovarian cancer. In concordance with the findings by Wilkinson et al.  
284 2019 and others with regard to doxorubicin associated cGAS-STING activation, we observed  
285 increases in plasma CXCL10/CCL5 levels post doxorubicin treatment compared to carboplatin.

286 Surprisingly, the expression of *Ccl5* gene was significantly higher in carboplatin and carboplatin  
287 + STING agonist treated tumours compared to those treated with doxorubicin and doxorubicin  
288 +STING agonist. This finding is suggestive of potential differences in cancer cell and immune cell  
289 specific STING pathway activation and warrants further investigation.

290 When used as a single agent, doxorubicin treated mice had a significant  
291 increase in survival compared to those treated with carboplatin. Similar to our previous findings,  
292 the significant increase in survival following addition of STING agonist to either carboplatin or  
293 doxorubicin treated tumours strongly suggests that immunomodulation via STING pathway  
294 activation post chemotherapy could be a promising approach to improve response to carboplatin  
295 chemotherapy. Surprisingly, survival was not further prolonged following the addition of STING  
296 agonist in the doxorubicin treated mice, and therefore we observed for the first time that response  
297 to doxorubicin treatment may not achieve the level of improvement as seen with carboplatin from  
298 the addition of STING agonist. Our leading explanation for this finding is the differential ICD  
299 response produced by doxorubicin and carboplatin<sup>36</sup>. Doxorubicin itself is known to induce IFN1  
300 response via STING pathway activation and downstream chemokine induction and therefore the  
301 addition of STING agonist may not significantly increase immune activation in the doxorubicin  
302 treated TIME<sup>37</sup>.

303 Tumour immune transcriptomic profiles 24 hours post chemotherapy and STING agonist  
304 treatment showed significant increase in expression of *Cd274* (gene encoding PD-L1).  
305 Furthermore, in our previous report we observed increased levels of PD-L1 in splenic myeloid  
306 derived suppressor cells post addition of STING agonist to carboplatin. We thus added anti-PD-  
307 L1 to the treatment regimen. Interestingly, the addition of anti-PD-L1 ICB to the doxorubicin +  
308 STING agonist treated group did not add further survival benefit. This was indeed an

309 unexpected finding given the large impact it had on survival following carboplatin  
310 treatment. However, doxorubicin is known to impact PD-L1 expression, such as decreased surface  
311 expression and increased nuclear expression on breast cancer cells<sup>38</sup>. This altered expression could  
312 potentially have impacted the response to anti-PD-L1 therapy in this study. Another possible  
313 reason could be the increased IL-6 level post doxorubicin treatment, which was amplified by a  
314 magnitude of >15 fold upon addition of STING agonist. As previously reported, the significant  
315 increase in IL6 might have contributed to lack of survival benefit in these mice due to its  
316 immunosuppressive effects on CD4+ T cells and increasing cancer cell PD-L1 expression<sup>39</sup>. IL-6  
317 promotes the survival of cancer cells and is usually associated with poor prognosis across cancer  
318 types. Importantly, in the context of immunotherapies, high IL-6 level is the key indicator of  
319 cytokine release syndrome that is usually associated with immune related adverse events<sup>40,41</sup>.  
320 Moreover, IL-6 is well known to be associated with chemotherapy resistance in HGSC, as  
321 previously reported by us and others<sup>10</sup>. As recently shown in melanoma models, blockade of IL-6  
322 following STING agonist treatment post doxorubicin treatment might prolong survival via  
323 augmenting T helper type I response<sup>39</sup>. However, a significant increase in survival was  
324 observed when doxorubicin, STING agonist and anti-PD-L1 were used in combination. Blockade  
325 of IL6 in these mice post addition of STING agonist may potentially lead to an increased survival  
326 benefit.

327         With growing awareness that the TIME is both impacted by and impacts the efficacy of  
328 cancer therapies, it's imperative that combination immunotherapy strategies are rationally  
329 designed. This study is the first to directly compare the combination of STING agonists with  
330 differential chemotherapies within the same model and importantly identifies that chemotherapy  
331 combinations with STING can mimic the TIME effects of a strong ICD inducer for precise immune

332 sensitization for PD-L1 ICB. This key finding suggests that in the development of combination  
333 immunotherapeutic strategies to avoid high-dose toxicity associated with chemotherapies, other  
334 agents inducing immune-stimulating pathways can be co-administered to prevent toxicities while  
335 eliciting similar immune stimulating effects.

336 Our study significantly advances the field of STING pathway activation based immune  
337 sensitization of tumours, however, there are some limitations to our study design. Since our  
338 question was primarily to evaluate *in vivo* differences in the synergistic effect of STING activation  
339 with different chemotherapy types and PD-L1 ICB, we did not perform the gold standard ICD  
340 induction assay in cancer cells prior to implantation in mice, as suggested by the consensus ICD  
341 guidelines proposed by Kepp et al.,<sup>42</sup>. Indeed, results from our study warrant future mechanistic  
342 studies to determine the cancer cell vs immune cell effects of STING activation following ICD  
343 inducing therapies. In conclusion, our novel findings, form the basis for rationalized combinations  
344 of STING pathway activation to improve chemotherapy response and sensitize HGSC to PD-L1  
345 ICB.

346

#### 347 **Acknowledgements**

348 MK conceptualized and designed the study. SN, NS and MK wrote the manuscript. TV reviewed  
349 and conducted the statistical analysis of NanoString data. SN, NS and EL conducted the  
350 experiments. AA performed statistical analysis of cytokine data. All co-authors reviewed the  
351 manuscript. This study was funded by grants from the Canadian Institutes of Health Research and  
352 Ontario Ministry of Research Innovation and Science; Early Researcher Award to MK.

#### 353 **Competing Interests**

354 The authors declare no competing interests.



## 355 **References**

- 356 1. Wilson, M. K. *et al.* Fifth ovarian cancer consensus conference of the gynecologic cancer  
357 intergroup: Recurrent disease. *Ann. Oncol.* **28**, 727–732 (2017).
- 358 2. Clifford, C. *et al.* Multi-omics in high-grade serous ovarian cancer: Biomarkers from  
359 genome to the immunome. *Am. J. Reprod. Immunol.* (2018). doi:10.1111/aji.12975
- 360 3. Bosquet, J. G., Marchion, D. C., Chon, H., Lancaster, J. M. & Chanock, S. Analysis of  
361 chemotherapeutic response in ovarian cancers using publicly available high-throughput  
362 data. *Cancer Res.* **74**, 3902–3912 (2014).
- 363 4. Odunsi, K. Immunotherapy in ovarian cancer Symposium article. **28**, 1–7 (2017).
- 364 5. Dallos, M. C. & Drake, C. G. Blocking PD-1/PD-L1 in Genitourinary Malignancies.  
365 *Cancer J. (United States)* **24**, 20–30 (2018).
- 366 6. Pitt, J. M. *et al.* Resistance Mechanisms to Immune-Checkpoint Blockade in Cancer:  
367 Tumor-Intrinsic and -Extrinsic Factors. *Immunity* **44**, 1255–1269 (2016).
- 368 7. Danaher, P. *et al.* Pan-cancer adaptive immune resistance as defined by the Tumor  
369 Inflammation Signature (TIS): Results from The Cancer Genome Atlas (TCGA). *J.*  
370 *Immunother. Cancer* **6**, 1–17 (2018).
- 371 8. Galon, J. & Bruni, D. Approaches to treat immune hot, altered and cold tumours with  
372 combination immunotherapies. *Nat. Rev. Drug Discov.* **18**, 197–218 (2019).
- 373 9. Koti, M. *et al.* A distinct pre-existing inflammatory tumour microenvironment is  
374 associated with chemotherapy resistance in high-grade serous epithelial ovarian cancer.  
375 *Br. J. Cancer* **112**, 1215–1222 (2015).
- 376 10. Au, K. K. *et al.* STAT1-associated intratumoural T<sub>H</sub> 1 immunity predicts chemotherapy  
377 resistance in high-grade serous ovarian cancer. *J. Pathol. Clin. Res.* (2016).

378 doi:10.1002/cjp2.55

- 379 11. Flood, B. A., Higgs, E. F., Li, S., Luke, J. J. & Gajewski, T. F. STING pathway agonism  
380 as a cancer therapeutic. *Immunol. Rev.* **290**, 24–38 (2019).
- 381 12. Ghaffari, A. *et al.* STING agonist therapy in combination with PD-1 immune checkpoint  
382 blockade enhances response to carboplatin chemotherapy in high-grade serous ovarian  
383 cancer. *Br. J. Cancer* (2018). doi:10.1038/s41416-018-0188-5
- 384 13. Ramanjulu, J. M. *et al.* Design of amidobenzimidazole STING receptor agonists with  
385 systemic activity. *Nature* **564**, 439–443 (2018).
- 386 14. Jayson, G. C., Kohn, E. C., Kitchener, H. C. & Ledermann, J. a. Ovarian cancer. *Lancet*  
387 **384**, 1376–1388 (2014).
- 388 15. Kroemer, G., Galluzzi, L., Kepp, O. & Zitvogel, L. Immunogenic cell death in cancer  
389 therapy. *Annu. Rev. Immunol.* **31**, 51–72 (2013).
- 390 16. Fridman, W. H., Zitvogel, L., Sautès-Fridman, C. & Kroemer, G. The immune contexture  
391 in cancer prognosis and treatment. *Nat. Rev. Clin. Oncol.* **14**, 717–734 (2017).
- 392 17. Sistigu, A. *et al.* Cancer cell-autonomous contribution of type I interferon signaling to the  
393 efficacy of chemotherapy. *Nat. Med.* **20**, 1301–1309 (2014).
- 394 18. Obeid, M. *et al.* Calreticulin exposure dictates the immunogenicity of cancer cell death.  
395 *Nat. Med.* **13**, 54–61 (2007).
- 396 19. Yoon, H. K. *et al.* Effect of anthracycline and taxane on the expression of programmed  
397 cell death ligand-1 and galectin-9 in triple-negative breast cancer. *Pathol. Res. Pract.* **214**,  
398 1626–1631 (2018).
- 399 20. Wang, J. *et al.* Checkpoint Blockade in Combination With Doxorubicin Augments Tumor  
400 Cell Apoptosis in Osteosarcoma. *J. Immunother.* **42**, 321–330 (2019).

- 401 21. Walton, J. *et al.* CRISPR / Cas9-Mediated Trp53 and Brca2 Knockout to Generate  
402 Improved Murine Models of Ovarian High-Grade Serous Carcinoma. **2000**, 6118–6129  
403 (2016).
- 404 22. Gibney, G. T., Weiner, L. M. & Atkins, M. B. Predictive biomarkers for checkpoint  
405 inhibitor-based immunotherapy. *Lancet Oncol.* **17**, e542–e551 (2016).
- 406 23. Bowtell, D. D. *et al.* Rethinking ovarian cancer II: reducing mortality from high-grade  
407 serous ovarian cancer. *Nat. Rev. Cancer* **15**, 668–679 (2015).
- 408 24. Au, K. K. *et al.* Gynecologic Oncology CXCL10 alters the tumour immune  
409 microenvironment and disease progression in a syngeneic murine model of high-grade  
410 serous ovarian cancer. *Gynecol. Oncol.* 4–13 (2017). doi:10.1016/j.ygyno.2017.03.007
- 411 25. Zhang, A. W. *et al.* Interfaces of Malignant and Immunologic Clonal Dynamics in  
412 Ovarian Cancer. *Cell* **173**, 1755-1769.e22 (2018).
- 413 26. Cristescu, R. *et al.* Pan-tumor genomic biomarkers for PD-1 checkpoint blockade-based  
414 immunotherapy. *Science (80-. ).* **362**, (2018).
- 415 27. Mariathasan, S. *et al.* TGF $\beta$  attenuates tumour response to PD-L1 blockade by  
416 contributing to exclusion of T cells. *Nature* **554**, 544–548 (2018).
- 417 28. Lo, C. S. *et al.* Neoadjuvant chemotherapy of ovarian cancer results in three patterns of  
418 tumor-infiltrating lymphocyte response with distinct implications for immunotherapy. *Am.*  
419 *Assoc. Cancer Res.* clincanres.1433.2016 (2016). doi:10.1158/1078-0432.ccr-16-1433
- 420 29. Kroemer, G., Galluzzi, L., Kepp, O. & Zitvogel, L. Immunogenic Cell Death in Cancer  
421 Therapy ICD: immunogenic cell death. *Annu. Rev. Immunol* **31**, 51–72 (2013).
- 422 30. Solanki, A. A. *et al.* Combining Immunotherapy with Radiotherapy for the Treatment of  
423 Genitourinary Malignancies. *Eur. Urol. Oncol.* **2**, 79–87 (2019).

- 424 31. Rodríguez-Ruiz, M. E., Vanpouille-Box, C., Melero, I., Formenti, S. C. & Demaria, S.  
425 Immunological Mechanisms Responsible for Radiation-Induced Abscopal Effect. *Trends*  
426 *Immunol.* **39**, 644–655 (2018).
- 427 32. Ding, L. *et al.* PARP Inhibition Elicits STING-Dependent Antitumor Immunity in Brca1-  
428 Deficient Ovarian Cancer. *Cell Rep.* **25**, 2972-2980.e5 (2018).
- 429 33. Blake, E. A. *et al.* Efficacy of pegylated liposomal doxorubicin maintenance therapy in  
430 platinum-sensitive recurrent epithelial ovarian cancer: a retrospective study. *Arch.*  
431 *Gynecol. Obstet.* **299**, 1641–1649 (2019).
- 432 34. Aletras, V., Hadjiliadis, D. & Hadjiliadis, N. Elements of the mechanism of action of the  
433 antitumor drug cis-platin or cis-DDP and its second generation derivatives. *Ep. Klin.*  
434 *Farmakol. kai Farmakokinet.* **13**, 153–180 (1995).
- 435 35. Fucikova, J. *et al.* Human tumor cells killed by anthracyclines induce a tumor-specific  
436 immune response. *Cancer Res.* **71**, 4821–4833 (2011).
- 437 36. Kepp, O. & Kroemer, G. Combinatorial strategies for the induction of immunogenic cell  
438 death. **6**, 1–11 (2015).
- 439 37. Ii, T. & Induce, I. *crossm.* **8**, (2017).
- 440 38. Ghebeh, H. *et al.* Doxorubicin downregulates cell surface B7-H1 expression and  
441 upregulates its nuclear expression in breast cancer cells: Role of B7-H1 as an anti-  
442 apoptotic molecule. *Breast Cancer Res.* **12**, (2010).
- 443 39. Tsukamoto, H. *et al.* Combined blockade of IL6 and PD-1/PD-L1 signaling abrogates  
444 mutual regulation of their immunosuppressive effects in the tumor microenvironment.  
445 *Cancer Res.* **78**, 5011–5022 (2018).
- 446 40. Rooney, C. & Sauer, T. Modeling cytokine release syndrome. *Nat. Med.* **24**, 705–706

447 (2018).

448 41. Teachey, D. T. *et al.* Identification of predictive biomarkers for cytokine release syndrome  
449 after chimeric antigen receptor T-cell therapy for acute lymphoblastic leukemia. *Cancer*  
450 *Discov.* **6**, 664–679 (2016).

451 42. Kepp, O. *et al.* Consensus guidelines for the detection of immunogenic cell death.  
452 *Oncoimmunology* **3**, 1–19 (2014).

453

454

455 **Figure legends**

456 **Figure 1. Conceptual model for ICD potentiation via addition of STING agonist post**  
457 **chemotherapy treatment (1A).** Response of an immunologically non-inflamed/cold tumour to  
458 treatment (chemotherapy/radiation and immune checkpoint blockade), could be enhanced by  
459 addition of STING agonist post chemotherapy. Chemotherapy specific immunogenic cell death  
460 (ICD) effect is key to response from STING activation and subsequent immune cell recruitment  
461 and antigen cross-presentation by myeloid cells post treatment. **Schematic showing the study**  
462 **design and treatment schedule in the ID8-*Trp53*<sup>-/-</sup> syngeneic murine model of HGSC (IB).**

463

464 **Figure 2. Doxorubicin activates higher immune responses within the tumour immune**  
465 **microenvironment compared to carboplatin (2A).** Heat map showing expression pattern of 60  
466 ICD associated genes in tumours from mice treated with carboplatin compared to doxorubicin.  
467 Scale function was used to center the expression scores and ComplexHeatmap package was used  
468 to build the heatmaps in R Bioconductor statistical environment.

469 **Doxorubicin induces differential ICD gene expression compared to carboplatin (2B).** A 60  
470 gene custom ICD NanoString panel was applied to measure the expression of genes associated  
471 with ICD pathways. Kruskal Wallis test was applied to compare the median between the three  
472 groups. Data analysis was performed using R Bioconductor. p-value<0.05 (\*) was considered  
473 statistically significant.

474

475 **Figure 3. STING agonist potentiates doxorubicin induced ICD (3A).** Heat map showing  
476 differential expression pattern of 60 ICD associated genes in tumours from mice treated with

477 carboplatin + STING agonist (SA) compared to doxorubicin + SA. Scale function was used to  
478 center the expression scores and ComplexHeatmap package was used to build the heatmaps in R.  
479 **STING agonist affects the expression of ICD genes in chemotherapy specific manner (3B).**  
480 Tumours from doxorubicin + STING agonist (SA) treated mice and carboplatin + SA treated mice  
481 were subjected to ICD gene expression profiling using a custom NanoString panel. Kruskal Wallis  
482 test was applied to compare the median between the three groups. Data analysis was performed  
483 using R Bioconductor.  $p$ -value $<0.05$  (\*) was considered statistically significant.

484

485 **Figure 4. Distinct plasma cytokine profile observed in mice treated with doxorubicin or**  
486 **carboplatin chemotherapy is further amplified with the addition of STING.** *ID8-Trp53<sup>-/-</sup>*  
487 tumor bearing mice were treated with (A) control, carboplatin or doxorubicin and (B) carboplatin  
488 + STING agonist or doxorubicin + STING agonist. Two-way ANOVA with Tukey's post hoc test  
489 was performed using GraphPad prism (mean  $\pm$  SEM, \* $P$  $<0.05$ , \*\* $P$  $<0.01$ , \*\*\* $P$  $<0.001$ ,  
490 \*\*\*\* $P$  $<0.0001$ ).

491

492 **Figure 5. Effect of STING agonist on overall survival and immune sensitization to PD-L1**  
493 **ICB in combination with carboplatin or doxorubicin chemotherapy.** Kaplan Meier survival  
494 analysis was performed using Graphpad prism software (version 7.0). Log-rank Mantel cox test  
495 was applied to determine statistically significant differences.  $p$ -value $<0.05$  (\*) was considered  
496 statistically significant; \*\*  $P$  $<0.01$ , \*\*\* $P$  $<0.001$ ).

497

498 **Table 1. Custom ICD gene panel for NanoString platform based gene expression profiling**

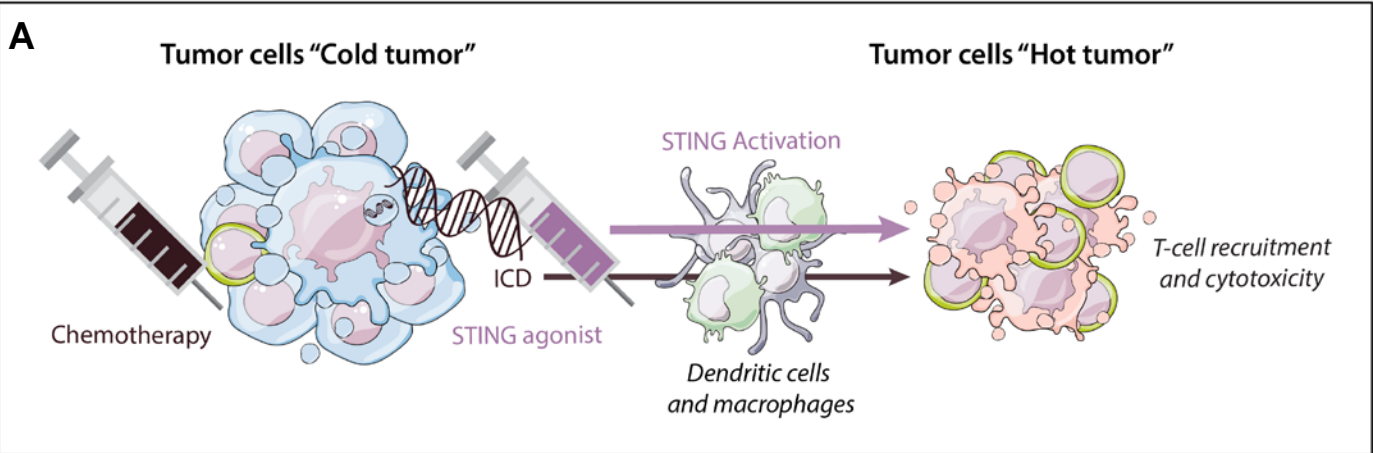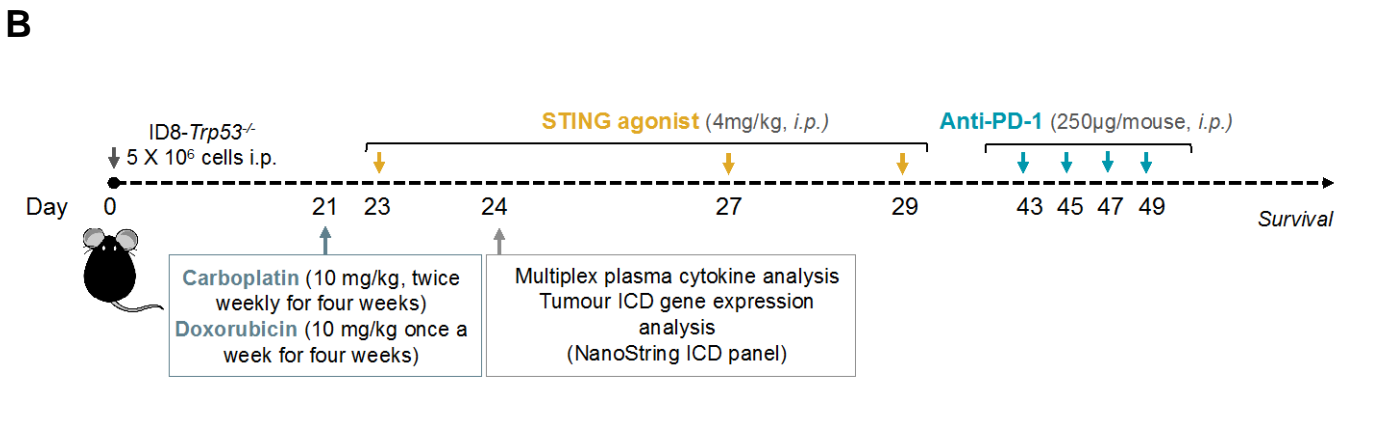

**Figure 1. A) Conceptual model for ICD potentiation via addition of STING agonist post chemotherapy treatment.** Response of an immunologically non-inflamed/cold tumour to treatment (chemotherapy/radiation and immune checkpoint blockade), could be enhanced by addition of STING agonist post chemotherapy. Chemotherapy specific immunogenic cell death (ICD) effect is key to response from STING activation and subsequent immune cell recruitment and antigen cross-presentation by myeloid cells post treatment.

**B) Schematic showing the study design and treatment schedule in the ID8-*Trp53*<sup>-/-</sup> syngeneic murine model of HGSC.**



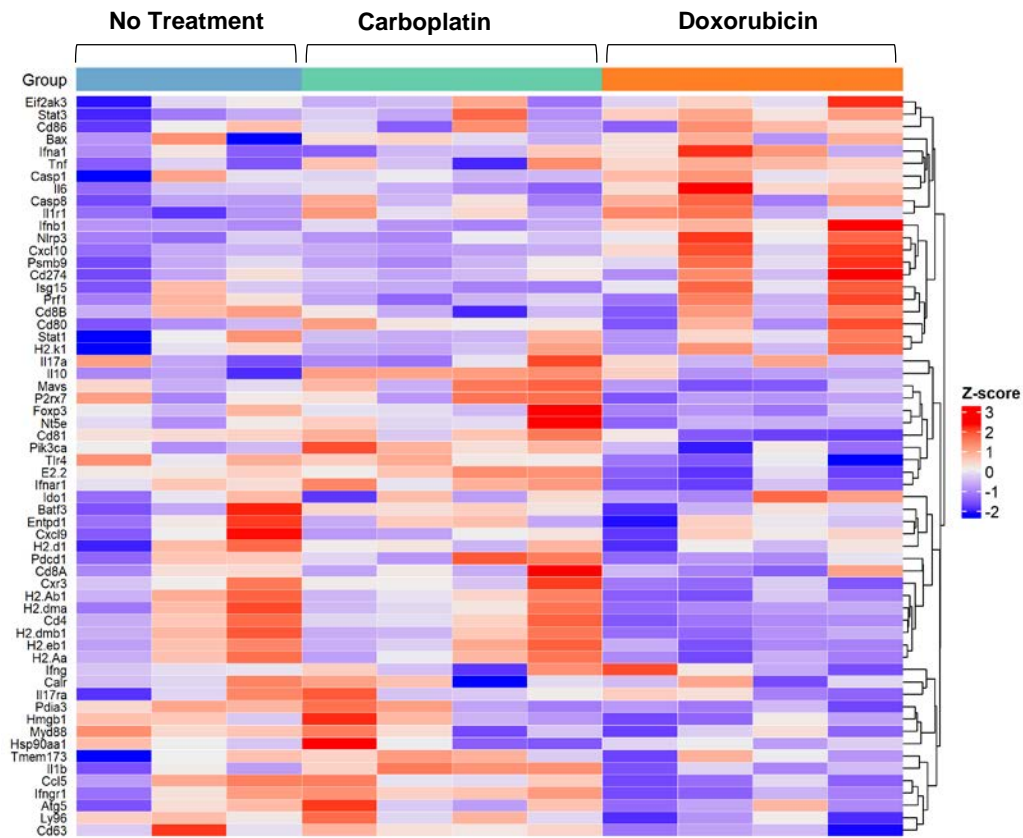

**Figure 2A. Doxorubicin activates higher immune responses within the tumour immune microenvironment compared to carboplatin.** Heat map showing expression pattern of 60 ICD associated genes in tumours from mice treated with carboplatin compared to doxorubicin. Scale function was used to center the expression scores and ComplexHeatmap package was used to build the heatmaps in R Bioconductor statistical environment.

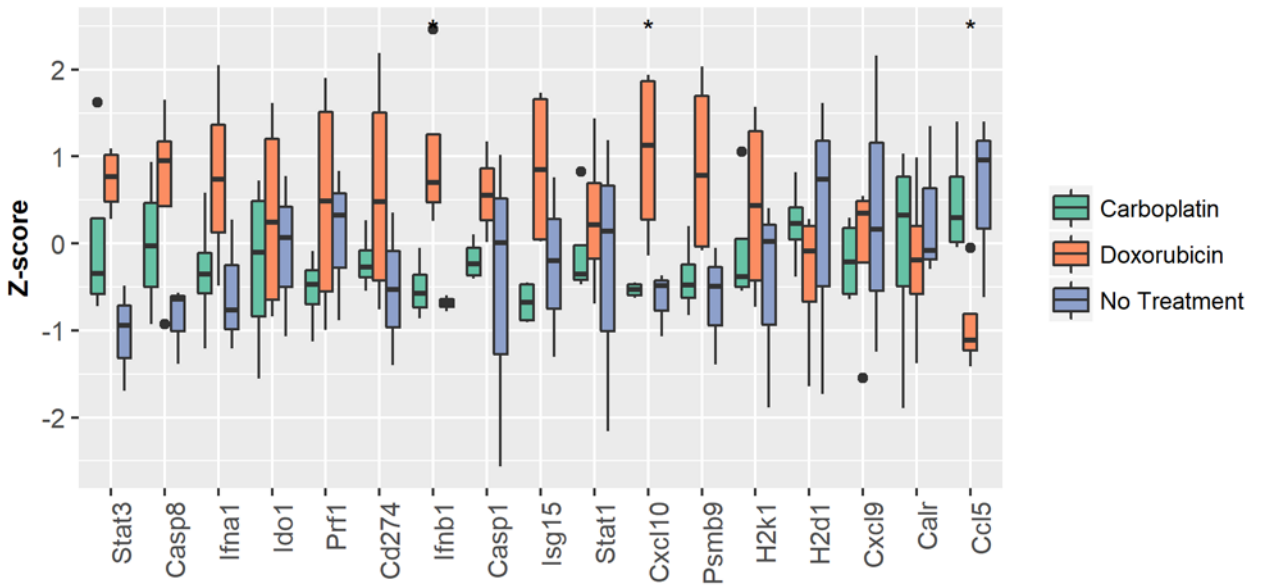

**Figure 2B. Doxorubicin induces differential ICD gene expression compared to carboplatin.** A 60 gene custom ICD NanoString panel was applied to measure the expression of genes associated with ICD pathways. Kruskal Wallis test was applied to compare the median between the three groups. Data analysis was performed using R Bioconductor.  $p\text{-value} < 0.05$  (\*) was considered statistically significant.

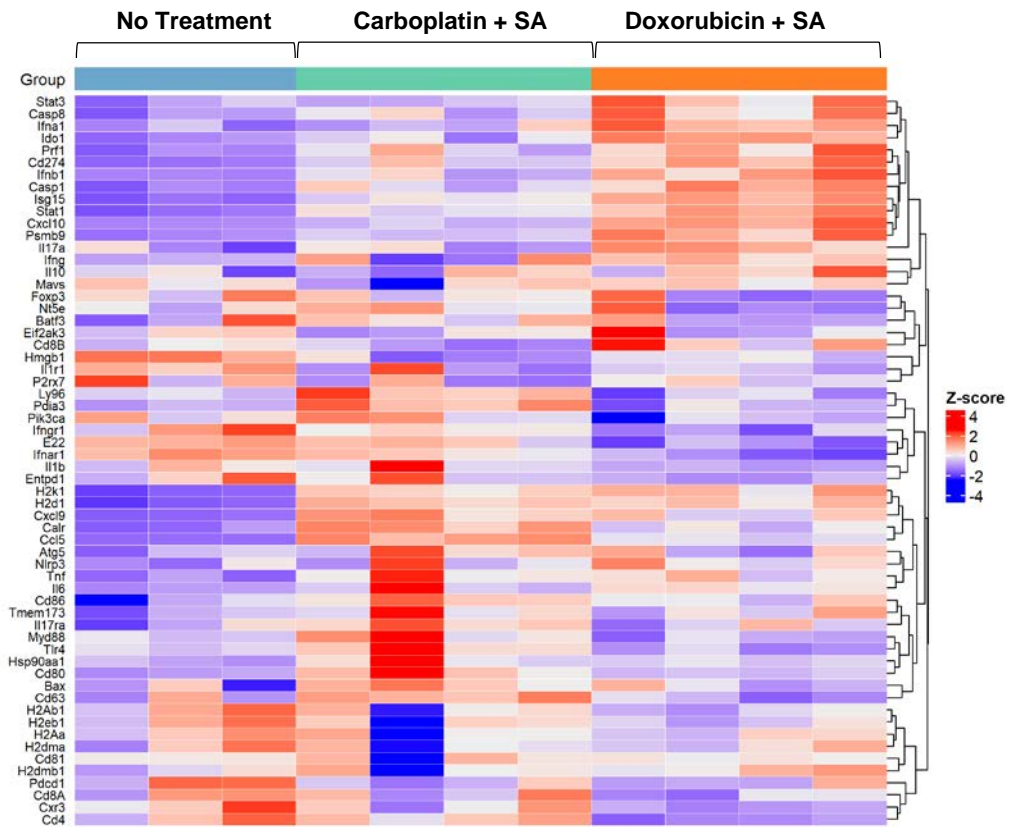

**Figure 3A. STING agonist potentiates doxorubicin induced ICD.** Heat map showing differential expression pattern of 60 ICD associated genes in tumours from mice treated with carboplatin + STING agonist (SA) compared to doxorubicin + SA. Scale function was used to center the expression scores and ComplexHeatmap package was used to build the heatmaps in R.

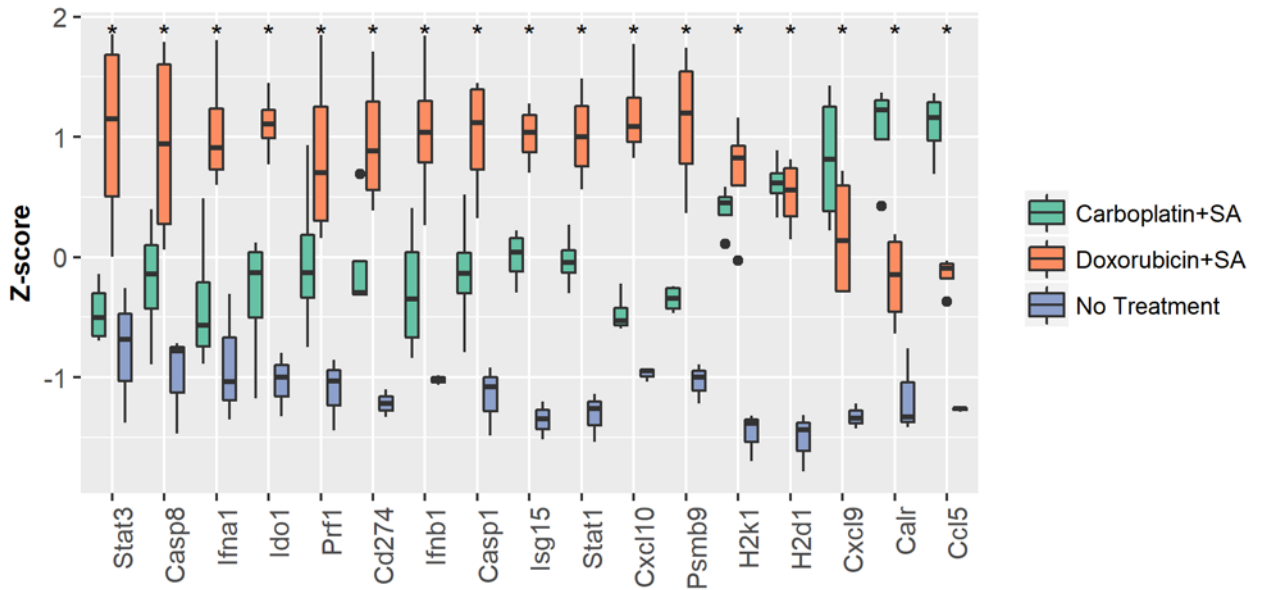

**Figure 3B. STING agonist affects the expression of ICD genes in chemotherapy specific manner.** Tumours from doxorubicin + STING agonist (SA) treated mice and carboplatin + SA treated mice were subjected to ICD gene expression profiling using a custom NanoString panel. Kruskal Wallis test was applied to compare the median between the three groups. Data analysis was performed using R Bioconductor.  $p$ -value $<0.05$  (\*) was considered statistically significant.

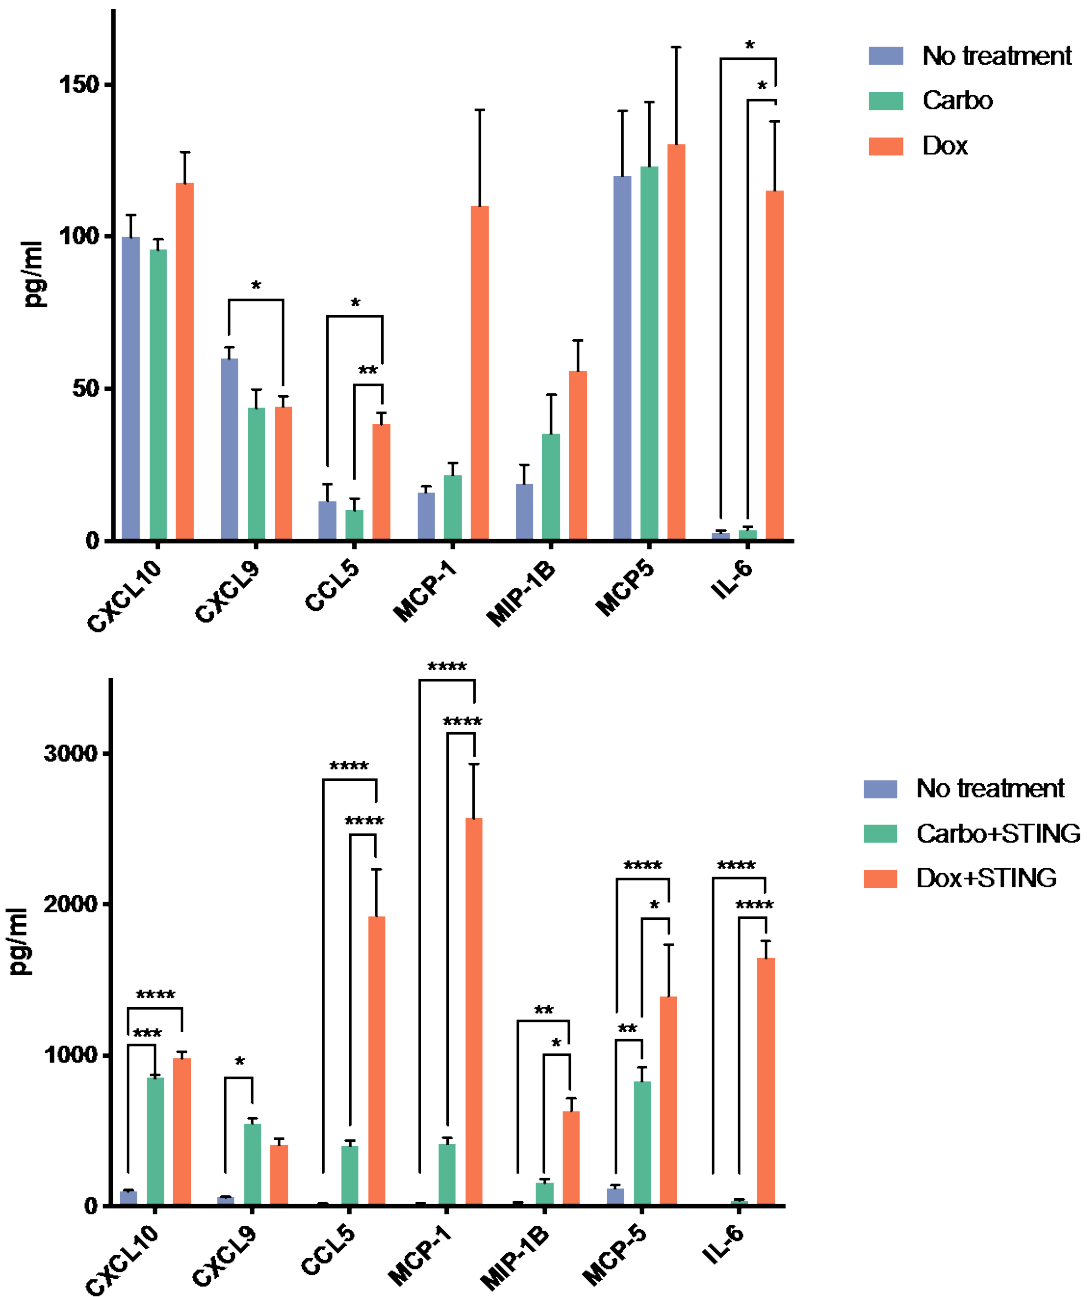

**Figure 4. Distinct plasma cytokine profile observed in mice treated with doxorubicin or carboplatin chemotherapy is further amplified with the addition of STING agonist.** ID8-*Trp53*<sup>-/-</sup> tumor bearing mice were treated with (A) control, carboplatin or doxorubicin and (B) carboplatin + STING agonist or doxorubicin + STING agonist. Two-way ANOVA with Tukey's post hoc test was performed using GraphPad prism (mean +/- SEM, \* $P < 0.05$ , \*\* $P < 0.01$ , \*\*\* $P < 0.001$ , \*\*\*\* $P < 0.0001$ )

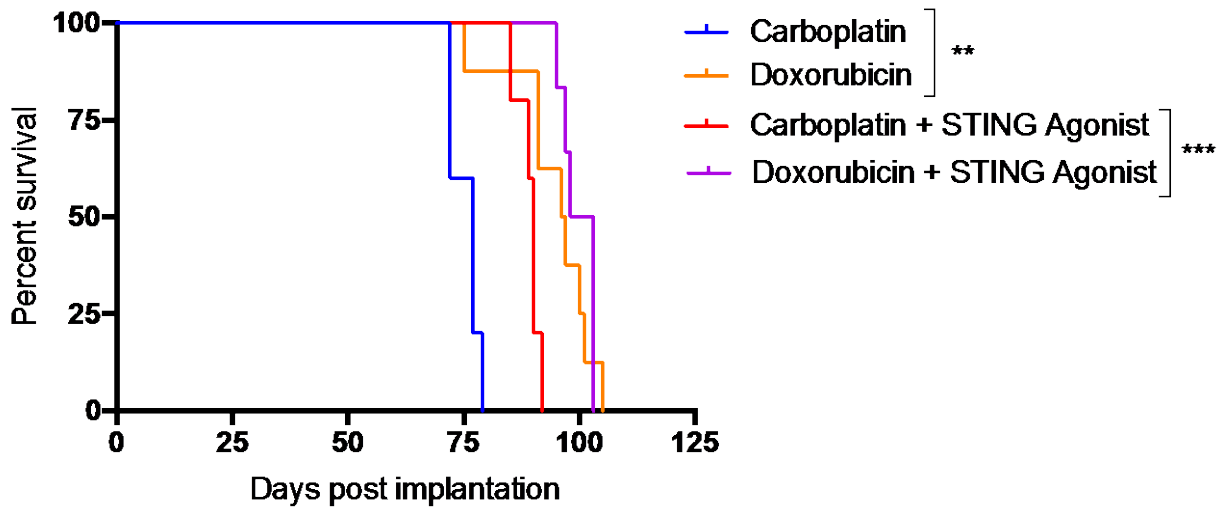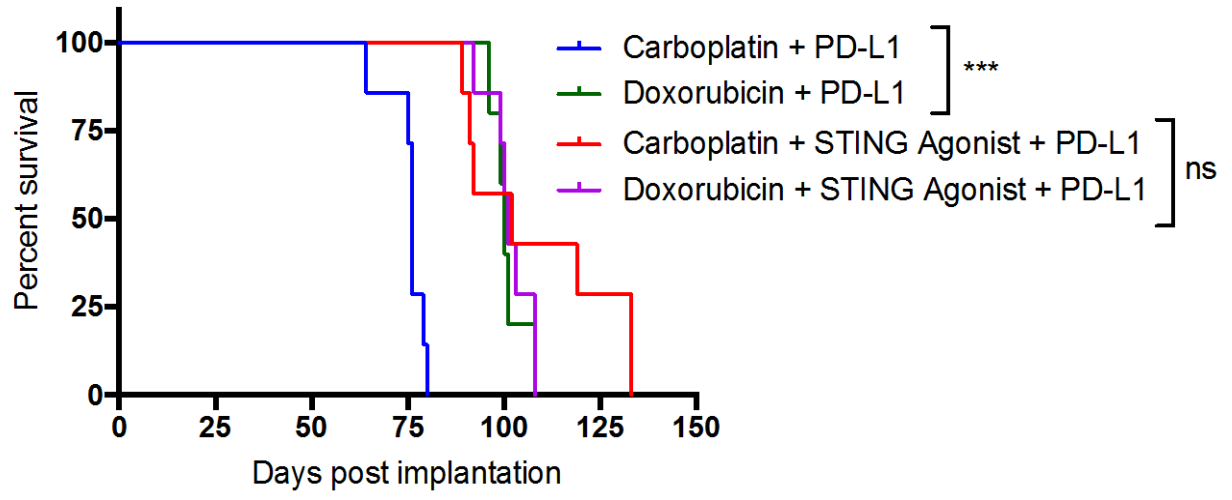

**Figure 5. Effect of STING agonist on overall survival and immune sensitization to PD-L1 ICB in combination with carboplatin or doxorubicin chemotherapy.** Kaplan Meier survival analysis was performed using Graphpad prism software (version 7.0). Log-rank Mantel cox test was applied to determine statistically significant differences. p-value<0.05 (\*) was considered statistically significant; \*\*  $P < 0.01$ , \*\*\*  $P < 0.001$

| mouse-ICD60 custom NanoString gene panel |             |            |           |             |           |                                                                      |             |
|------------------------------------------|-------------|------------|-----------|-------------|-----------|----------------------------------------------------------------------|-------------|
| CODESET DETAILS                          |             |            |           |             |           |                                                                      |             |
|                                          | Customer Id | Accession  | Position  | Target Sequ | HUGO Gene | NSID                                                                 | Design Rema |
| 1                                        | ATG5        | NM_0013140 | 263-362   | GGAAGAACT   | Atg5      | NM_001314013.1:262                                                   |             |
| 2                                        | BATF3       | NM_030060  | 346-445   | CCTATGAAC   | Batf3     | NM_030060.2:345                                                      |             |
| 3                                        | BAX         | NM_007527  | 736-835   | CATAAATTAT  | Bax       | NM_007527.3:735                                                      |             |
| 4                                        | CALR        | NM_007591  | 552-651   | GCACCAAGA   | Calr      | NM_007591.3:551                                                      |             |
| 5                                        | CASP1       | NM_009807  | 260-359   | GACAATAAA   | Casp1     | NM_009807.2:259                                                      |             |
| 6                                        | CASP8       | NM_009812  | 1464-1563 | TTTCATTGAG  | Casp8     | NM_009812.2:1463                                                     |             |
| 7                                        | CCL5        | NM_013653  | 166-265   | CCTCGTGCC   | Ccl5      | NM_013653.1:165                                                      |             |
| 8                                        | CD274       | NM_021893  | 516-615   | TGAACTAATA  | Cd274     | NM_021893.2:515                                                      |             |
| 9                                        | CD4         | NM_013488  | 951-1050  | AAGAGGTGT   | Cd4       | NM_013488.2:950                                                      |             |
| 10                                       | Cd63        | NM_001042  | 221-320   | GTGGGATTG   | Cd63      | NM_001042580.1:220                                                   |             |
| 11                                       | CD80        | NM_009855  | 211-310   | TGGCTTTCC   | Cd80      | NM_009855.2:210                                                      |             |
| 12                                       | cd81        | NM_133655  | 576-675   | GGCATCTGG   | Cd81      | NM_133655.2:575                                                      |             |
| 13                                       | CD86        | NM_019388  | 252-351   | CAAAACATAA  | Cd86      | NM_019388.3:251                                                      |             |
| 14                                       | CD8A        | NM_001081  | 356-455   | CCACCTTCGT  | Cd8a      | NM_001081110.2:355                                                   |             |
| 15                                       | CD8B        | NM_009858  | 1076-1175 | GCCACCTCAT  | Cd8b1     | NM_009858.2:1075                                                     |             |
| 16                                       | CXCL10      | NM_021274  | 116-215   | AGGACGGTC   | Cxcl10    | NM_021274.1:115                                                      |             |
| 17                                       | CXCL9       | NM_008599  | 41-140    | TAGAACTCAC  | Cxcl9     | NM_008599.2:40                                                       |             |
| 18                                       | CXCR3       | NM_009910  | 606-705   | GTTGTATGG   | Cxcr3     | NM_009910.2:605                                                      |             |
| 19                                       | Ecd3        | NM_153799  | 2571-2670 | CTTTATAGTT  | Ecd3      | NM_153799.3:2570                                                     |             |
| 20                                       | EIF2AK3     | NM_010121  | 503-602   | GGCAGGTCC   | Eif2ak3   | NM_010121.3:502                                                      |             |
| 21                                       | ENTPD1      | NM_009848  | 2063-2162 | CAAAACCCAG  | Entpd1    | NM_009848.3:2062                                                     |             |
| 22                                       | FOXP3       | NM_054039  | 195-294   | TGCCTTCAGA  | Foxp3     | NM_054039.2:194                                                      |             |
| 23                                       | Gusb        | NM_010368  | 284-383   | CCCTTCGGGA  | Gusb      | NM_010368.1:283                                                      |             |
| 24                                       | H2-Aa       | NM_010378  | 451-550   | TCAGAAATAA  | H2-Aa     | NM_010378.2:450                                                      |             |
| 25                                       | H2-Ab1      | NM_207105  | 165-264   | AAGGCATTT   | H2-Ab1    | NM_207105.2:164                                                      |             |
| 26                                       | H2-D1       | NM_010380  | 1134-1233 | GTGACAGAC   | H2-D1     | NM_010380.3:1133                                                     |             |
| 27                                       | H2-Dma      | NM_010386  | 531-630   | AGCTGTGCA   | H2-Dma    | NM_010386.3:530                                                      |             |
| 28                                       | H2-DMb1     | NM_010387  | 13-112    | ACAAGTTTAC  | H2-DMb1   | NM_010387.3:12                                                       |             |
| 29                                       | H2-Eb1      | NM_010382  | 936-1035  | AAACATGTCC  | H2-Eb1    | NM_010382.2:935                                                      |             |
| 30                                       | H2-K1       | NM_001001  | 38-137    | CCCGCAGAA   | H2-K1     | NM_001001892.2:37                                                    |             |
| 31                                       | HMGB1       | NM_010439  | 1575-1674 | GTGGGACTA   | Hmgb1     | NM_010439.3:1574                                                     |             |
| 32                                       | HSP90AA1    | NM_010480  | 236-335   | CCTTGATCAT  | Hsp90aa1  | NM_010480.5:235                                                      |             |
| 33                                       | IDO1        | NM_008324  | 522-621   | ACATGGACA   | Ido1      | NM_008324.1:521                                                      |             |
| 34                                       | IFNA1       | NM_010502  | 355-454   | CTGCAAGGC   | Ifna1     | NM_010502 also targets several other interferon alpha genes @ >90%   |             |
| 35                                       | IFNAR1      | NM_010508  | 1196-1295 | TGGGAAAAC   | Ifnar1    | NM_010508.1:1195                                                     |             |
| 36                                       | IFNB1       | NM_010510  | 336-435   | GATGAACTC   | Ifnb1     | NM_010510.1:335                                                      |             |
| 37                                       | IFNG        | NM_008337  | 96-195    | CTAGCTCTGA  | Ifng      | NM_008337.1:95                                                       |             |
| 38                                       | IFNGR1      | NM_010511  | 986-1085  | AAGCATAAT   | Ifngr1    | NM_010511.2:985                                                      |             |
| 39                                       | IL10        | NM_010548  | 986-1085  | GGGCCCTTT   | Il10      | NM_010548.1:985                                                      |             |
| 40                                       | IL17A       | NM_010552  | 206-305   | ACCTCAAAGT  | Il17a     | NM_010552.3:205                                                      |             |
| 41                                       | IL17RA      | NM_008359  | 313-412   | CCCAAAAAC   | Il17ra    | NM_008359.1:312                                                      |             |
| 42                                       | IL1B        | NM_008361  | 1121-1220 | GTTGATTCAA  | Il1b      | NM_008361.3:1120                                                     |             |
| 43                                       | IL1R1       | NM_001123  | 821-920   | CTTCTCGGA   | Il1r1     | NM_001123382.1:820                                                   |             |
| 44                                       | IL6         | NM_031168  | 41-140    | CTCTCTGCA   | Il6       | NM_031168.1:40                                                       |             |
| 45                                       | Isg15       | NM_015783  | 390-489   | TATGAGGTC   | Isg15     | NM_015783 also targets predicted gene 9706, Gm9706 (XR_168557) @ 95% |             |
| 46                                       | LY96        | NM_016923  | 369-468   | GAGCTCTGA   | Ly96      | NM_016923.1:368                                                      |             |
| 47                                       | Mavs        | NM_144888  | 2511-2610 | CAGAACTCA   | Mavs      | NM_144888.1:2510                                                     |             |
| 48                                       | MYD88       | NM_010851  | 1596-1695 | GCTGCAGGC   | Myd88     | NM_010851.2:1595                                                     |             |
| 49                                       | NLRP3       | NM_145827  | 509-608   | ACGTGTACA   | Nlrp3     | NM_145827.3:508                                                      |             |
| 50                                       | NT5E        | NM_011851  | 1601-1700 | AAGCATGAC   | Nt5e      | NM_011851.3:1600                                                     |             |
| 51                                       | P2RX7       | NM_001038  | 379-478   | GGAGAATGT   | P2rx7     | NM_001038839.2:378                                                   |             |
| 52                                       | PDCD1       | NM_008798  | 1135-1234 | AGCAGGCTT   | Pdcd1     | NM_008798.1:1134                                                     |             |
| 53                                       | PDIA3       | NM_007952  | 1011-1110 | GATGCTGGA   | Pdia3     | NM_007952.2:1010                                                     |             |
| 54                                       | PIK3CA      | NM_008839  | 1256-1355 | ACTGTCCGT   | Pik3ca    | NM_008839.1:1255                                                     |             |
| 55                                       | PRF1        | NM_011073  | 1351-1450 | ACAGCTACT   | Prf1      | NM_011073.2:1350                                                     |             |
| 56                                       | PSMB9       | NM_013585  | 541-640   | TTCACCACAG  | Psmb9     | NM_013585.2:540                                                      |             |
| 57                                       | Sap130      | NM_172965  | 2183-2282 | TAAATCCGA   | Sap130    | NM_172965.2:2182                                                     |             |
| 58                                       | Sdha        | NM_023281  | 251-350   | CTTGCGAGC   | Sdha      | NM_023281.1:250                                                      |             |
| 59                                       | SF3A3       | NM_029157  | 41-140    | ACAATTTTAG  | Sf3a3     | NM_029157.3:40                                                       |             |
| 60                                       | STAT1       | NM_009283  | 1591-1690 | ACGCTGGGA   | Stat1     | NM_009283.3:1590                                                     |             |
| 61                                       | STAT3       | NM_213659  | 1361-1460 | AGCTTAAAA   | Stat3     | NM_213659.2:1360                                                     |             |
| 62                                       | E2-2        | NM_013685  | 3046-3145 | AATTACCGGA  | Tcf4      | NM_013685.1:3045                                                     |             |
| 63                                       | TLR4        | NM_021297  | 2511-2610 | AACGGCAAC   | Tlr4      | NM_021297.2:2510                                                     |             |
| 64                                       | TMEM173     | NM_028261  | 1793-1892 | GCAGACTTC   | Tmem173   | NM_028261.1:1792                                                     |             |
| 65                                       | TNF         | NM_013693  | 515-614   | TGGATCTCA   | Tnf       | NM_013693.2:514                                                      |             |
